# Supplementary material
Source: PubMed Central journal article supplement (PMC6060360)
Supplement: JB.00240-18_zjb999094815s1.pdf [file JB.00240-18_zjb999094815s1.pdf]

## FIGURE LEGENDS

1

2 **Figure S1: Production and purification of PspA-His derivatives in *E. coli*.** His-tagged PspA

3 derivatives were produced in *E. coli* BL21/pLysS and purified as described in Materials and

4 Methods. Aliquots from various fractions were then incubated with SDS-loading dye and

5 resolved by SDS-PAGE on 12% gels. Gels were stained with Coomassie brilliant blue. L,

6 protein ladder; TCL, total cell lysate; FT, flow-throw; W1, wash 1; W2, wash 2; E1, elute 1; E2,

7 elute 2; E3, elute 3; E4, elute 4; E5, elute 5. PspA<sub>Mtb</sub>, PspA from *M. tuberculosis*; PspA<sub>Mtb</sub>ΔH1,

8 PspA from *M. tuberculosis* missing residues 1-22; PspA<sub>Rho</sub>, PspA from *Rhococcous jostii* RHA1;

9 PspA<sub>Eco</sub>, PspA from *Escherichia coli* BL21.

10

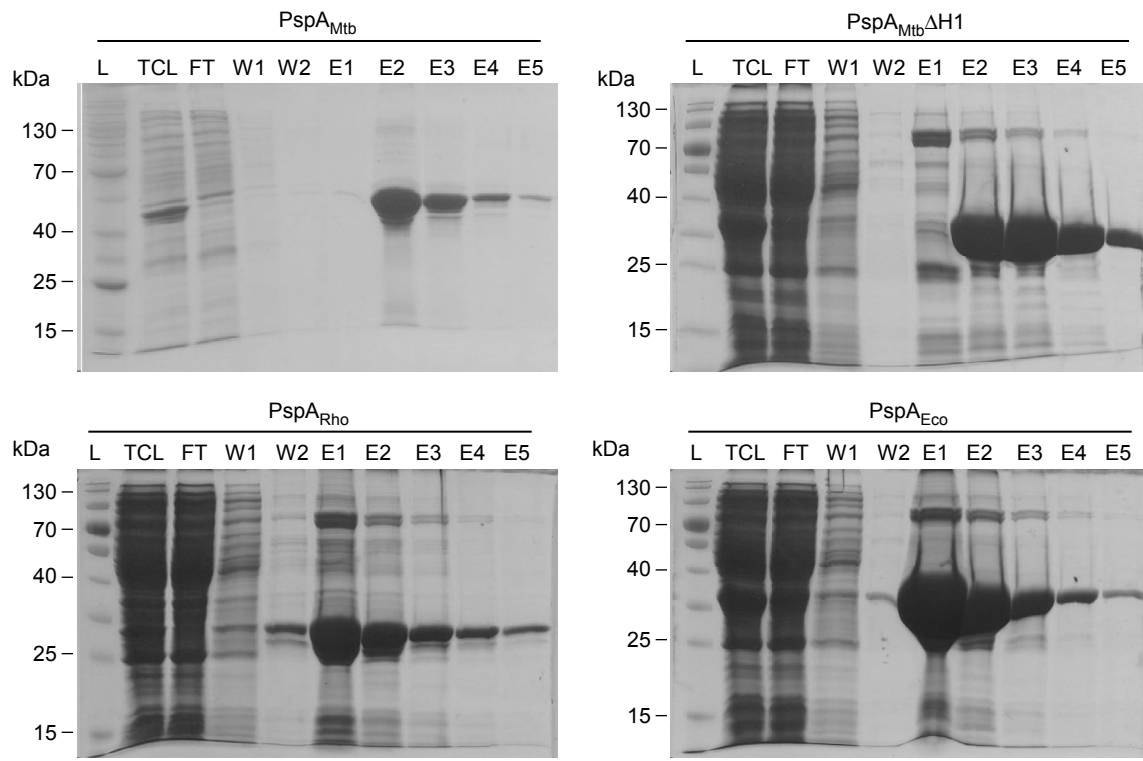

Figure S1

Table S1. Oligonucleotides used in this study

| Primer name         | Sequence <sup>a</sup> (5' to 3')                               | Purpose                                                                                   |
|---------------------|----------------------------------------------------------------|-------------------------------------------------------------------------------------------|
| 2744c_H1FWDNheI     | GCTAGCCATGCCGACCCCAAGGTGCAGA                                   | <i>pspA<sub>Mtb</sub></i> ΔH1 forward primer for insertion into pET24b expression vector  |
| Rv2744cRev4-NotI    | GCGGCCGCCTGACCGTAGGGCTGCTC                                     | <i>pspA<sub>Mtb</sub></i> ΔH1 reverse primer for insertion into pET24b expression vector  |
| 2744cFpSE100PstI    | CTGCAGATGGCCAATCCGTTTCGTTAAAGCC                                | <i>pspA<sub>Mtb</sub></i> ΔH1 forward primer for insertion into pSE100                    |
| 2744cRpSE100EcoRV   | GATATCCATCTGACCGTAGGGCTGCTC                                    | <i>pspA<sub>Mtb</sub></i> ΔH1 reverse primer for insertion into pSE100                    |
| GFPmut3_no_fusion_F | GGATCCCAGTAAACCACAACAACCTTTTCACTGG                             | Forward primer for cloning <i>gfpmut3</i> alone                                           |
| GFPmut3_both_R      | AAGCTTTTTGTATAGTTCATGCATGCC                                    | Reverse primer for cloning <i>gfpmut3</i> alone or with fusion to H1 domain               |
| GFPmut3_fusion_F    | GGATCCAGTAAAGGCGAAGAACCTTTTCACTGG                              | <i>gfpmut3</i> forward cloning primer for fusion to H1 domain                             |
| H1_truncation_F     | GGATCCCATGGCCAATCCGTTTCGTTAAAGCC                               | Forward primer to generate 1xH1- <i>gfpmut3</i> fusion                                    |
| MSMEG_4703_HelixF   | GATCCGGAGATGCTCGACGAGCTCTCGACCGGGTGGAGCCGTTTCTCGGTGGACCTCATCG  | Sense oligonucleotide for cloning MSMEG_4703 amphipathic helix in front of <i>gfpmut3</i> |
| MSMEG_4703_HelixR   | GATCCGATGAGGTCCACCGAGAAACGGCTCCACCCGGTTCGAGAGCTCGTTCGAGCACTCCG | Anti-sense oligonucleotide for MSMEG_4703                                                 |

|                        |                                                           |                                                                                                 |
|------------------------|-----------------------------------------------------------|-------------------------------------------------------------------------------------------------|
| F_Eco_pspA_pET24       | CCCGGATCCGATGGGTATTTTTCTCGCTTTGCCG                        | amphipathic helix in front of <i>gfpmut3</i><br><i>pspA<sub>Eco</sub></i> common forward primer |
| R_Eco_pspA_pSE100      | CCCAAGCTTTTATTGATTGATTGTCTTGCTTCAAAAAGGC                  | <i>pspA<sub>Eco</sub></i> reverse primer for insertion into pSE100-derived vectors              |
| F_Rho_pspA_BamHI       | CCCGGATCCGATGGCTAATCCTTTCGTCAAGGG                         | <i>pspA<sub>Rho</sub></i> common forward primer                                                 |
| R_Rho_pspA_HindIII     | CCCAAGCTTCTACTGCGCGGCCGGTCTGGCC                           | <i>pspA<sub>Rho</sub></i> reverse primer for insertion into pSE100-derived vectors              |
| Eco_R_pET24real        | CCCCCTCGAGCGCTTGATTGTCTTGCTTCATTTTGGC                     | <i>pspA<sub>Eco</sub></i> reverse primer for insertion into pET24b expression vector            |
| Rho_R_pET24real        | TTTAAGCTTCGCTGCGCGGCCGGTCTGGCC                            | <i>pspA<sub>Rho</sub></i> reverse primer for insertion into pET24b expression vector            |
| Rv2744cFWD-NheI        | GCTAGCGCCAATCCGTTTCGTTAAAGCC                              | <i>pspA<sub>Mtb</sub></i> forward primer for future mutagenesis reactions                       |
| Rv2744c_Rev_BglII      | AGATCTGCCTGACCGTAGGGCTGCTCGGC                             | <i>pspA<sub>Mtb</sub></i> reverse primer for future mutagenesis reactions                       |
| Amp_Rev                | [Phos]GTCAGAAGTAAGTTGGCCGAGTGTTATCACTCATGG                | Mutagenesis reverse primer (provided with Change-IT kit)                                        |
| Rv2744c_F5A_single     | [Phos]GCTAGCGCCAATCCG <u>GCC</u> GTTAAAGCCTGGAAG          | <i>pspA<sub>Mtb</sub></i> F5A mutagenesis primer                                                |
| Rv2744c_W9A_mut        | [Phos]AATCCGTTTCGTTAAAGCC <u>GCC</u> AAGTACCTCATGGCGCTG   | <i>pspA<sub>Mtb</sub></i> W9A mutagenesis primer                                                |
| Rv2744c_F5A/W9A_double | [Phos]GCTAGCGCCAATCCG <u>GCC</u> GTTAAAGCC <u>GCC</u> AAG | <i>pspA<sub>Mtb</sub></i> F5A/W9A mutagenesis primer                                            |
| Rv2744c_F16A_mut       | [Phos]AAGTACCTCATGGCGCTG <u>GCC</u> AGCTCGAAGATCGACGAG    | <i>pspA<sub>Mtb</sub></i> F16A mutagenesis primer                                               |

|                   |                                                |                                                      |
|-------------------|------------------------------------------------|------------------------------------------------------|
| Rc2744c_Y11A_mut  | [Phos]TTCGTTAAAGCCTGGAAGGCCCTCATGGCGCTGTTTCAGC | <i>pspA<sub>Mtb</sub></i> Y11A<br>mutagenesis primer |
| Rv2744c_K7A_mut   | [Phos]GCCAATCCGTTTCGTTGCCGCCTTGAAGTACCTC       | <i>pspA<sub>Mtb</sub></i> K7A<br>mutagenesis primer  |
| H1GFP_F_W9E       | [Phos]AATCCGTTTCGTTAAAGCCGAAAAGTACCTCATGGCGCTG | <i>pspA<sub>Mtb</sub></i> W9E<br>mutagenesis primer  |
| pSE100R2          | ATAACGTTCTCGGCTCGATGATCCC                      | Sequencing primer for<br>pSE100-based vectors        |
| pSE100F2          | CGAGCGGGAGAACTCCCTATCAGT                       | Sequencing primer for<br>pSE100-based vectors        |
| M13_Reverse       | CAGGAAACAGCTATGAC                              | Sequencing primer for<br>pCR2.1-TOPO                 |
| M13_Forward_(-20) | GTAAAACGACGGCCAG                               | Sequencing primer for<br>pCR2.1-TOPO                 |
| T7 Promoter       | TAATACGACTCACTATAGGG                           | Sequencing primer for<br>pSTBlue-1                   |
| SP6 Promoter      | GATTTAGGTGACACTATAG                            | Sequencing primer for<br>pSTBlue-1                   |

<sup>a</sup> [Phos], primer contains 5' phosphorylation modification for use with Quick Change mutagenesis kit. Line indicates mutated residues.

Table S2. *M. smegmatis* proteins possessing a PspA<sub>Mtb</sub> H1-like amphipathic helix.

| Uniprot # | Unique proteins | Gene   | Protein                                                    | Amphipathic helix properties |                         |       |       |    |                                            |
|-----------|-----------------|--------|------------------------------------------------------------|------------------------------|-------------------------|-------|-------|----|--------------------------------------------|
|           |                 |        |                                                            | Helix position               | Helix sequence          | H     | μH    | z  | # Large Hydrophobic face residues (LIFMWY) |
| A0QT14    | 1               | add    | Adenosine deaminase                                        | 319-336                      | RLVEAFGYGWSDLERFTI      | 0.537 | 0.468 | -1 | 5                                          |
| P0CH36    | 2               | adhC1  | NADP-dependent alcohol dehydrogenase C 1                   | 231-248                      | TFDKLAGSFDLILNTVSA      | 0.535 | 0.483 | -1 | 5                                          |
| P0CH37    | 3               | adhC2  | NADP-dependent alcohol dehydrogenase C 2                   | 231-248                      | TFDKLAGSFDLILNTVSA      | 0.535 | 0.483 | -1 | 5                                          |
| A0QRE7    | 4               | amiD   | Amidase                                                    | 351-368                      | RLRTLQAAWNEMFTGID       | 0.509 | 0.474 | 0  | 6                                          |
| A0QVJ3    | 5               | asnB   | Asparagine synthase (Glutamine-hydrolyzing)                | 108-126                      | YHHWGD R FVEHLKGMFAFA   | 0.544 | 0.499 | 0  | 6                                          |
| A0R203    | 6               | atpFH  | ATP synthase subunit b-delta                               | 198-215                      | GLTNLADELASVAKLLLS      | 0.529 | 0.479 | -1 | 5                                          |
| A0QR36    | 7               | ccdA   | Cytochrome C biogenesis protein transmembrane region       | 234-255                      | GAALVTGLWNEFVS YVRDAFVS | 0.598 | 0.384 | -1 | 6                                          |
| A0R3Q0    | 8               | cheR   | CheR methyltransferase, SAM binding domain protein         | 51-69                        | LDVLQASSDEFSALFN TIL    | 0.587 | 0.507 | -3 | 7                                          |
| A0R574    | 9               | clpC1  | ATP-dependent Clp protease ATP-binding subunit ClpC1       | 725-743                      | DEIIQMVDLMIGRVS NQLK    | 0.444 | 0.496 | -1 | 5                                          |
| A0QS49    | 10              | cmaA1  | Cyclopropane-fatty-acyl-phospholipid synthase 1            | 10-27                        | ELQSIYDISNEFYELFLG      | 0.589 | 0.474 | -4 | 7                                          |
| A0R063    | 11              | cobU   | Cobinamide kinase / cobinamide phosphate guanyltransferase | 78-96                        | HVATLVDDIGGWLTATMDR     | 0.491 | 0.46  | -2 | 5                                          |
| A0QXA8    | 12              | cydA   | Cytochrome D ubiquinol oxidase subunit 1                   | 75-93                        | QFGMNWSEYSRFVGDIFGA     | 0.517 | 0.458 | -1 | 5                                          |
| A0QXA8    | 12              | cydA   | Cytochrome D ubiquinol oxidase subunit 1                   | 42-59                        | TGNDTWYRLTRFFGKLFL      | 0.56  | 0.485 | 2  | 6                                          |
| A0R6P3    | 13              | cyp123 | Cytochrome P450                                            | 236-256                      | NAGTETVGR LFGWLGKLLGEH  | 0.425 | 0.477 | 0  | 6                                          |
| A0R0W6    | 14              | cysT   | Sulfate ABC transporter, permease protein CysT             | 50-67                        | LWQAAGGGWDAFWRAVTS      | 0.607 | 0.541 | 0  | 5                                          |
| A0R310    | 15              | dctA   | Aerobic C4-dicarboxylate transport protein                 | 43-60                        | EVGKSVGVLGTMFVNLIK      | 0.561 | 0.492 | 1  | 5                                          |
| A0QNP4    | 16              | dehII  | Haloacid dehalogenase, type II                             | 56-73                        | DFFTLGQQVLRMLADIHG      | 0.603 | 0.478 | -1 | 7                                          |
| A0QXD9    | 17              | eltP   | Erythritol/L-threitol-binding protein                      | 440-457                      | FFDTTKDWAVALQDIYGG      | 0.507 | 0.501 | -2 | 6                                          |
| A0R614    | 18              | embB   | Probable arabinosyltransferase A                           | 1010-1027                    | DTWQDGINGLLGITDLL       | 0.558 | 0.511 | -3 | 6                                          |
| A0QNS5    | 19              | erg3   | C-5 sterol desaturase                                      | 215-232                      | LDKNYGGILIFDRMFGS       | 0.577 | 0.472 | 0  | 7                                          |
| A0QW55    | 20              | erg3   | C-5 sterol desaturase                                      | 206-223                      | IDKNYGGVFIVWDR LFGT     | 0.592 | 0.488 | 0  | 6                                          |

|        |    |       |                                                                  |           |                      |       |       |    |   |
|--------|----|-------|------------------------------------------------------------------|-----------|----------------------|-------|-------|----|---|
| A0R6J9 | 21 | est   | Beta-lactamase                                                   | 28-45     | RAIEQIWDSVRYWYQSGL   | 0.517 | 0.519 | 0  | 6 |
| A0R666 | 22 | ethR  | HTH-type transcriptional regulator EthR                          | 130-147   | EFKEFWSGLMQKWIAATA   | 0.582 | 0.5   | 0  | 6 |
| A0QTW7 | 23 | fadE3 | Acyl-CoA dehydrogenase FadE3                                     | 68-85     | VQVAEELARGWMSLAGAM   | 0.513 | 0.474 | -1 | 5 |
| A0QNU6 | 24 | frc   | Formyl-CoA:oxalate CoA-transferase                               | 99-117    | KQIFTDLVSRVDILVENFG  | 0.498 | 0.477 | -1 | 5 |
| A0QWW2 | 25 | gapA  | Glyceraldehyde-3-phosphate dehydrogenase                         | 167-185   | LAKVLNDEFQIVKGLMTTI  | 0.579 | 0.549 | 0  | 5 |
| A0QYF7 | 26 | gcvP  | Glycine dehydrogenase (decarboxylating)                          | 535-552   | RKLIADLQSWLTAITGYD   | 0.514 | 0.472 | 0  | 7 |
| A0R1C2 | 27 | gdh   | NAD-specific glutamate dehydrogenase                             | 892-910   | ATFSDIANEVAKSYGFWLG  | 0.506 | 0.454 | -1 | 5 |
| A0QT70 | 28 | glpD2 | Glycerol-3-phosphate dehydrogenase                               | 443-462   | VRHLLDRYGSLIGEVLALAD | 0.511 | 0.513 | -1 | 7 |
| A0QXA1 | 29 | gltB  | Ferredoxin-dependent glutamate synthase 1                        | 1162-1179 | FVENFFTFIAEDIRRYLA   | 0.603 | 0.529 | -1 | 6 |
| A0QR00 | 30 | gpmA  | 2,3-bisphosphoglycerate-dependent phosphoglycerate mutase        | 175-192   | VLIAAHGNSLRALVKYLD   | 0.536 | 0.471 | 1  | 6 |
| A0QSV0 | 31 | guaA  | GMP synthase [glutamine-hydrolyzing]                             | 181-199   | QQVLSRFLHDFAGIDATWT  | 0.552 | 0.472 | -1 | 5 |
| A0R401 | 32 | hisD  | Histidinol dehydrogenase                                         | 341-359   | YFLKRLRNYGSLFLGRWST  | 0.532 | 0.444 | 4  | 7 |
| A0QUN9 | 33 | hypD  | Hydrogenase expression/formation protein HypD                    | 41-58     | IIRNGIDQLLEGSVEFVH   | 0.513 | 0.476 | -2 | 6 |
| A0QVM7 | 34 | infB  | Translation initiation factor IF-2                               | 491-508   | SVIYQAIDEIEAALKGML   | 0.547 | 0.518 | -2 | 6 |
| A0R397 | 35 | kdpC  | Potassium-transporting ATPase KdpC subunit                       | 3-20      | FTNIVRQHTAALRALLAL   | 0.592 | 0.486 | 2  | 6 |
| A0R2B1 | 36 | kgd   | Multifunctional 2-oxoglutarate metabolism enzyme                 | 972-989   | LWEAQFGDFVNGAQSIIID  | 0.539 | 0.52  | -3 | 5 |
| A0QR49 | 37 | kgtP  | Dicarboxylic acid transport integral membrane protein KgtP       | 22-39     | IWNTIRGSSGNLVEWYDV   | 0.542 | 0.495 | -1 | 6 |
| A0R4Z6 | 38 | kstR2 | HTH-type transcriptional repressor KstR2                         | 64-82     | RDFLDWLFGRYQQILDAT   | 0.513 | 0.459 | -1 | 7 |
| A0R0Y9 | 39 | lepA  | Elongation factor 4                                              | 224-241   | FDSVYDIYRGVVTYVRVV   | 0.581 | 0.49  | 0  | 5 |
| A0QT91 | 40 | lhr   | ATP-dependent DNA helicase                                       | 1193-1210 | ILETLGHGGAYFFRQLTD   | 0.542 | 0.492 | -1 | 6 |
| A0R5U1 | 41 | lys1  | Saccharopine dehydrogenase                                       | 256-275   | YGLGSEFIDVLKTLHKLGLD | 0.523 | 0.424 | -1 | 9 |
| A0QYV1 | 42 | lysX  | Lysylphosphatidylglycerol biosynthesis bifunctional protein LysX | 680-697   | LFAQLRDWSGEVQLLLLDN  | 0.544 | 0.488 | -2 | 6 |
| A0R0U9 | 43 | mbtB  | Phenyloxazoline synthase mbtB                                    | 1063-1080 | SLERALAAILGELLSVAD   | 0.534 | 0.5   | -2 | 5 |
| A0QNR4 | 44 | mce1C | MCE-family protein MCE1c                                         | 278-296   | QDLADILTVAGKFITSLAE  | 0.512 | 0.505 | -2 | 6 |
| A0R4F8 | 45 | mce-2 | MCE-family protein MCE1a                                         | 138-156   | ATGVTTEFNTLFETIMRIT  | 0.543 | 0.478 | -1 | 6 |
| A0QNR3 | 46 | mce2B | MCE-family protein MCE1b                                         | 161-179   | SLITIFQQGGGTINDILDQ  | 0.53  | 0.484 | -2 | 7 |

|        |    |            |                                                                      |           |                       |       |       |    |   |
|--------|----|------------|----------------------------------------------------------------------|-----------|-----------------------|-------|-------|----|---|
| A0QRK0 | 47 | mce2B      | MCE-family protein Mce6B                                             | 236-253   | LVESMGSIKVVRLSTI      | 0.527 | 0.491 | 1  | 5 |
| A0QPC2 | 48 | mce3B      | MCE-family protein MCE3b                                             | 196-213   | IGEVIGNLDVLLGSLGEQ    | 0.552 | 0.511 | -3 | 6 |
| A0R4N8 | 49 | mce4A      | Virulence factor Mce family protein                                  | 136-155   | DVQLEVNTLFQTLSDLLDKI  | 0.501 | 0.532 | -3 | 6 |
| A0R4N7 | 50 | mce4B      | MCE-family protein MCE4b                                             | 191-210   | DQLISDVIANLNTVLGTVDE  | 0.439 | 0.476 | -4 | 5 |
| A0R6Q4 | 51 | mdcC       | Malonate decarboxylase acyl carrier protein                          | 48-65     | TSVDGFDTVWQDTLARFF    | 0.515 | 0.472 | -2 | 5 |
| A0R6Q9 | 52 | metE       | 5-methyltetrahydropteroyltriglutamate-homocysteine methyltransferase | 195-212   | RLGELVSVYQGQLELLAD    | 0.588 | 0.511 | -2 | 6 |
| A0QNF0 | 53 | MSMEG_0018 | ABC transporter, permease/ATP-binding protein                        | 419-436   | IADLRRWVATITQEVHVF    | 0.59  | 0.48  | 0  | 5 |
| A0QNF1 | 54 | MSMEG_0019 | Amino acid adenylation                                               | 1056-1073 | DVRTLAGMWTDLLTAIAS    | 0.596 | 0.518 | -1 | 5 |
| A0QNF1 | 54 | MSMEG_0019 | Amino acid adenylation                                               | 5135-5156 | SVAELGELWVAALRELGLATG | 0.531 | 0.44  | -2 | 7 |
| A0QNF1 | 54 | MSMEG_0019 | Amino acid adenylation                                               | 1230-1247 | DDLHTMIETVHHIVADGW    | 0.527 | 0.487 | -4 | 5 |
| A0QNI3 | 55 | MSMEG_0054 | ISMsm2, transposase                                                  | 287-305   | TSSSWLNLVERWFAELTTK   | 0.511 | 0.482 | 0  | 5 |
| A0QNJ7 | 56 | MSMEG_0067 | Conserved hypothetical proline and alanine rich protein              | 348-365   | GLFQKATRGVLTSTISGLV   | 0.537 | 0.487 | 2  | 5 |
| A0QNP5 | 57 | MSMEG_0117 | Alpha/beta hydrolase fold protein                                    | 73-91     | FDYTFDALADLTEGLLTHL   | 0.612 | 0.541 | -4 | 7 |
| A0QNU5 | 58 | MSMEG_0167 | Transmembrane transport protein                                      | 301-319   | SLKAIINGTGRGVIGWISD   | 0.499 | 0.456 | 1  | 5 |
| A0QNV3 | 59 | MSMEG_0175 | FAD dependent oxidoreductase, putative                               | 154-171   | LLTTLTAAIAEAGGRFVR    | 0.515 | 0.476 | 1  | 6 |
| A0QNW1 | 60 | MSMEG_0184 | Transferase                                                          | 149-166   | EQLSAVLATMARHFTAHW    | 0.556 | 0.48  | 0  | 6 |
| A0QNY4 | 61 | MSMEG_0206 | Acyltransferase                                                      | 579-598   | GFVSYDQAWLDGLTRLVTVL  | 0.602 | 0.528 | -1 | 7 |
| A0QNY8 | 62 | MSMEG_0211 | ABC transporter, ATP-binding protein                                 | 377-394   | MIRHLGSALTDVTVVFDE    | 0.519 | 0.511 | -2 | 5 |
| A0QP24 | 63 | MSMEG_0247 | Secreted peptidase                                                   | 283-301   | NHIVQDIGDGVYAFYAHLQ   | 0.513 | 0.452 | -2 | 5 |
| A0QP36 | 64 | MSMEG_0258 | Oxidoreductase, short chain dehydrogenase/reductase family protein   | 95-112    | LVDEWDAMIDVNVRRLLN    | 0.511 | 0.493 | -3 | 5 |
| A0QP37 | 65 | MSMEG_0260 | DNA-binding protein                                                  | 188-205   | AVLTELDRSAEFTELWS     | 0.523 | 0.478 | -3 | 5 |
| A0QP54 | 66 | MSMEG_0277 | Aminotransferase class-III                                           | 321-339   | SMVHYIADIFDTGLRRIQA   | 0.499 | 0.492 | 0  | 6 |
| A0QP81 | 67 | MSMEG_0304 | Acyl-CoA synthase                                                    | 332-349   | DVVIAFMDFRGDVIYNNY    | 0.543 | 0.471 | -2 | 7 |
| A0QPE3 | 68 | MSMEG_0368 | Conserved hypothetical alanine and proline rich protein              | 195-212   | MEQIISDIGQYGAMLNRI    | 0.507 | 0.511 | -1 | 6 |
| A0QPF2 | 69 | MSMEG_0377 | Nitrile hydratase                                                    | 85-103    | KFRYYEKWLGGISQFFVVK   | 0.453 | 0.446 | 2  | 5 |
| A0QPF4 | 70 | MSMEG_0379 | Nitrile hydratase activator P14k                                     | 39-56     | WSEFQQSLIDAIGAWDAS    | 0.542 | 0.517 | -3 | 5 |



|        |    |            |                                                                  |         |                             |       |       |    |   |
|--------|----|------------|------------------------------------------------------------------|---------|-----------------------------|-------|-------|----|---|
| A0QPG0 | 71 | MSMEG_0385 | Putative glycosyl transferase                                    | 83-100  | EALGVTISQWEDIGKTLV          | 0.512 | 0.501 | -2 | 5 |
| A0QPG1 | 72 | MSMEG_0386 | NAD dependent epimerase/dehydratase family protein               | 240-259 | GQSLTNSYTGIVALFARLAR        | 0.47  | 0.478 | 2  | 6 |
| A0QPR4 | 73 | MSMEG_0489 | Putative recemase                                                | 246-263 | YLTLNLALEKLAELFED           | 0.528 | 0.497 | -3 | 8 |
| A0QPR7 | 74 | MSMEG_0492 | Conserved hypothetical integral membrane protein                 | 123-140 | RISREFGGAWGWLAAVLS          | 0.606 | 0.507 | 1  | 5 |
| A0QPX1 | 75 | MSMEG_0547 | ISMsm5, transposase                                              | 304-329 | RGSFNKSVKELIAAISAFIEGWNQRAH | 0.373 | 0.469 | 1  | 7 |
| A0QPX2 | 76 | MSMEG_0549 | ABC transporter, permease protein                                | 44-61   | GDLWTHLQTSVSRVFAGY          | 0.54  | 0.493 | 0  | 5 |
| A0QPZ0 | 77 | MSMEG_0567 | Selenophosphate synthetase                                       | 268-285 | RAVLDRIGGIAAASSAW           | 0.524 | 0.481 | 1  | 5 |
| A0QQ29 | 78 | MSMEG_0606 | Putative transcriptional regulatory protein TetR                 | 114-131 | VSQLAMVSDDFAQYWAEI          | 0.578 | 0.484 | -3 | 5 |
| A0QQ75 | 79 | MSMEG_0654 | Uncharacterized protein                                          | 195-212 | AALRRAARYASGWWSFLT          | 0.519 | 0.474 | 3  | 6 |
| A0QQ85 | 80 | MSMEG_0664 | FAD dependent oxidoreductase                                     | 174-197 | RAVADITRLLTMSIADLLDDWFE S   | 0.522 | 0.495 | -3 | 7 |
| A0QQA1 | 81 | MSMEG_0681 | p450 heme-thiolate protein                                       | 255-273 | GFETTVNLLGNGIRMLLDH         | 0.519 | 0.494 | -1 | 5 |
| A0QQD4 | 82 | MSMEG_0715 | 3-oxoacyl-[acyl-carrier-protein] reductase                       | 74-92   | AVDMVVDTWGRLDAVILNA         | 0.57  | 0.462 | -2 | 5 |
| A0QQD6 | 83 | MSMEG_0718 | Acetyl-CoA synthetase                                            | 85-109  | RVAGLLTRQVESWITALAAWRS GLV  | 0.582 | 0.467 | 2  | 7 |
| A0QQE7 | 84 | MSMEG_0729 | Uncharacterized protein                                          | 55-72   | ALTALFIEVSNLFGRLDK          | 0.568 | 0.499 | 0  | 6 |
| A0QQF3 | 85 | MSMEG_0735 | Putative transcriptional regulator                               | 97-114  | LRQRVAGIIDMLYDGLTA          | 0.512 | 0.475 | 0  | 5 |
| A0QQG1 | 86 | MSMEG_0743 | Xanthine dehydrogenase                                           | 1-18    | MLGGVRDVLGTL SAVWES         | 0.573 | 0.546 | -1 | 5 |
| A0QQQ4 | 87 | MSMEG_0838 | AsnC-family protein transcriptional regulator                    | 278-297 | WDVLTEVITRTGEDLITVLD        | 0.552 | 0.56  | -4 | 5 |
| A0QQY2 | 88 | MSMEG_0917 | Uncharacterized protein                                          | 378-395 | TEYGVEITAITETIERW           | 0.523 | 0.48  | -3 | 6 |
| A0QQZ9 | 89 | MSMEG_0934 | Uncharacterized protein                                          | 114-132 | VLGQVLEAVDSDFNLTLEL         | 0.571 | 0.519 | -4 | 5 |
| A0QRA2 | 90 | MSMEG_1043 | GntR-family protein transcriptional regulator                    | 451-471 | QLAEAVELLARAWHSITGTIG       | 0.548 | 0.532 | -1 | 5 |
| A0QRC4 | 91 | MSMEG_1066 | Uncharacterized protein                                          | 1-18    | MTETTTTFMDNVLGWLHK          | 0.531 | 0.474 | -1 | 6 |
| A0QRE2 | 92 | MSMEG_1084 | ABC transporter, solute-binding protein                          | 409-427 | QEWISYLGWWARGMQDGVG         | 0.528 | 0.503 | -1 | 6 |
| A0QRH4 | 93 | MSMEG_1118 | Amino acid permease                                              | 92-109  | ISRGLGRIVGLGSGLLTT          | 0.558 | 0.486 | 2  | 6 |
| A0QRH6 | 94 | MSMEG_1120 | Nitrilase/cyanide hydratase and apolipoprotein N-acyltransferase | 203-220 | LTKDISRFIALEGRVWSV          | 0.531 | 0.485 | 1  | 5 |
| A0QRI9 | 95 | MSMEG_1133 | Bifunctional short chain isoprenyl diphosphate synthase          | 204-221 | RLGGIVGTAFQIADDIID          | 0.514 | 0.499 | -2 | 6 |
| A0QRK1 | 96 | MSMEG_1145 | MCE-family protein Mce6C                                         | 241-258 | STIGSLMNQSNLLAEFV           | 0.527 | 0.477 | -1 | 6 |

|        |     |            |                                                                          |           |                         |       |       |    |   |
|--------|-----|------------|--------------------------------------------------------------------------|-----------|-------------------------|-------|-------|----|---|
| A0QRK6 | 97  | MSMEG_1150 | Conserved secreted protein                                               | 89-106    | YLSTLVGNWMKAGQKMVA      | 0.531 | 0.494 | 2  | 6 |
| A0QRK8 | 98  | MSMEG_1152 | Citrate-proton symporter                                                 | 226-243   | EQNAGTWGGVLKHWIGLL      | 0.604 | 0.519 | 0  | 6 |
| A0QRL3 | 99  | MSMEG_1157 | Short chain dehydrogenase                                                | 104-121   | IDTIGDLLLLKTHVRLVKA     | .515. | 483   | 1  | 6 |
| A0QRL6 | 100 | MSMEG_1160 | ABC-type nitrate/sulfonate/bicarbonate transport system ATPase component | 177-194   | SLQDELLRIWQATGKTIL      | 0.533 | 0.526 | 0  | 5 |
| A0QRL7 | 101 | MSMEG_1161 | Taurine transport system permease protein                                | 68-86     | GQLWEHVSASLSRALAGFA     | 0.513 | 0.483 | 0  | 5 |
| A0QRP3 | 102 | MSMEG_1189 | Uncharacterized protein                                                  | 268-285   | WLMGIGRIDIDAFHGIAEN     | 0.518 | 0.483 | -2 | 5 |
| A0QRU1 | 103 | MSMEG_1238 | Type III restriction enzyme                                              | 421-439   | LAIISAIEGLVQKHSRVIV     | 0.635 | 0.423 | 1  | 5 |
| A0QRV5 | 104 | MSMEG_1252 | Uncharacterized protein                                                  | 1374-1391 | GMSVRALMDNFGELITQI      | 0.542 | 0.509 | -1 | 6 |
| A0QRY8 | 105 | MSMEG_1286 | Sulfatase                                                                | 330-349   | GELLGAHGGLHQKWFNLYDE    | 0.425 | 0.473 | -2 | 7 |
| A0QS05 | 106 | MSMEG_1303 | Putative transcriptional regulator                                       | 197-214   | LIGELTSAHNEFARLWAA      | 0.536 | 0.545 | -1 | 6 |
| A0QSC6 | 107 | MSMEG_1431 | Cytochrome P450-terp                                                     | 211-228   | SAEELNAVILDFFNLYFTE     | 0.539 | 0.493 | -4 | 6 |
| A0QSC7 | 108 | MSMEG_1432 | Carboxylic ester hydrolase                                               | 459-476   | QALADQMIGYWSQFVRTG      | 0.591 | 0.47  | 0  | 6 |
| A0QSN0 | 109 | MSMEG_1536 | Cell division FtsK/SpoIIIE                                               | 835-852   | WSTLRTEFESLESTITTL      | 0.511 | 0.475 | -2 | 6 |
| A0QSN1 | 110 | MSMEG_1537 | Conserved hypothetical alanine and valine rich protein                   | 43-61     | IVDDHFVTVEDLWTRVLGT     | 0.583 | 0.465 | -3 | 5 |
| A0QSW1 | 111 | MSMEG_1621 | Pyrimidine-specific ribonucleoside hydrolase RihA                        | 329-347   | TVFFDRFISRVGAFQAQLT     | 0.536 | 0.466 | 2  | 6 |
| A0QSW5 | 112 | MSMEG_1626 | Putative DNA-binding protein                                             | 200-218   | TALVDELSAASTDFGDWWA     | 0.507 | 0.472 | -4 | 5 |
| A0QSX6 | 113 | MSMEG_1637 | Histidine kinase                                                         | 476-498   | VGSAAGDLIHLLAELLDNALRYS | 0.508 | 0.475 | -2 | 8 |
| A0QTA9 | 114 | MSMEG_1775 | Cytochrome P450                                                          | 168-185   | ADEFMTAWWRLVRRRLTLG     | 0.586 | 0.487 | 1  | 6 |
| A0QTE5 | 115 | MSMEG_1811 | Maf-like protein MSMEG_1811/MSMEI_1767                                   | 191-208   | LRALFERLEVSVADLWSA      | 0.559 | 0.503 | -1 | 6 |
| A0QTH0 | 116 | MSMEG_1838 | Cationic amino acid transporter                                          | 124-141   | VAKGWSSYLGTVFNFGGG      | 0.546 | 0.468 | 1  | 5 |
| A0QTL4 | 117 | MSMEG_1886 | Fatty acid desaturase                                                    | 339-356   | TGSFLVQYGKTRWRTIAKL     | 0.514 | 0.489 | 3  | 6 |
| A0QTT5 | 118 | MSMEG_1957 | Uncharacterized protein                                                  | 48-65     | MGDLGQIFTKLGEMFSGA      | 0.508 | 0.538 | -1 | 7 |
| A0QTU1 | 119 | MSMEG_1963 | Putative transcriptional regulatory protein                              | 891-908   | VLRAQLRWMEAVLATWRG      | 0.587 | 0.521 | 2  | 6 |
| A0QTV3 | 120 | MSMEG_1977 | Alcohol dehydrogenase                                                    | 280-297   | ISTEINFIGNLVGSYNDL      | 0.541 | 0.479 | -2 | 7 |
| A0QTW2 | 121 | MSMEG_1986 | Tartrate dehydrogenase                                                   | 88-105    | SLWGSLIQFRRHFDQYVN      | 0.524 | 0.482 | 1  | 6 |
| A0QTZ6 | 122 | MSMEG_2022 | Gluconate permease                                                       | 77-99     | AILQQTGAIQRLVETLLRWFGAK | 0.557 | 0.431 | 2  | 5 |

|        |     |            |                                                        |         |                       |       |       |    |   |
|--------|-----|------------|--------------------------------------------------------|---------|-----------------------|-------|-------|----|---|
| A0QTZ9 | 123 | MSMEG_2025 | Putative IclR family protein transcriptional regulator | 239-256 | WVDLVVGYAEQITRSLGG    | 0.553 | 0.532 | -1 | 5 |
| A0QU11 | 124 | MSMEG_2037 | Uncharacterized protein                                | 112-129 | LIGALRAIFDAWQTGERL    | 0.571 | 0.481 | 0  | 5 |
| A0QU67 | 125 | MSMEG_2096 | Probable membrane transporter protein                  | 176-193 | NAIKNLLGMVANTTAGVF    | 0.518 | 0.476 | 1  | 5 |
| A0QU92 | 126 | MSMEG_2122 | Dihydroxyacetone kinase, L subunit                     | 1-18    | MDLSTLTAWLREYARLID    | 0.552 | 0.483 | -1 | 5 |
| A0QUD9 | 127 | MSMEG_2173 | GntR-family protein transcriptional regulator          | 158-177 | AHSSLLAKLMHEIAGLIRET  | 0.486 | 0.486 | 0  | 7 |
| A0QUE5 | 128 | MSMEG_2179 | Transcriptional regulator, TetR family                 | 133-151 | ETLAAGYREWMALLEASFE   | 0.485 | 0.484 | -3 | 7 |
| A0QUE5 | 128 | MSMEG_2179 | Transcriptional regulator, TetR family                 | 192-209 | LSDTFRFMVNYLRLFATD    | 0.584 | 0.476 | 0  | 6 |
| A0QUF0 | 129 | MSMEG_2184 | Amino acid permease                                    | 101-118 | YQWSRRMGGEVIGWFGGW    | 0.602 | 0.484 | 1  | 7 |
| A0QUF7 | 130 | MSMEG_2191 | Acyl-CoA dehydrogenase                                 | 319-337 | SSMLKVLSTELSQILTELS   | 0.557 | 0.469 | -1 | 7 |
| A0QUL3 | 131 | MSMEG_2248 | Two-component system sensor kinase                     | 567-584 | MSHVVDGLAGLYADLQEL    | 0.541 | 0.522 | -3 | 6 |
| A0QUM5 | 132 | MSMEG_2261 | Uncharacterized protein                                | 97-114  | LAGLANSLATLSGGLVKA    | 0.531 | 0.479 | 1  | 5 |
| A0QUU7 | 133 | MSMEG_2340 | Uncharacterized protein                                | 129-146 | IDSAAAVADWLQGFIDEL    | 0.572 | 0.509 | -4 | 6 |
| A0QV46 | 134 | MSMEG_2444 | Dienelactone hydrolase                                 | 211-228 | AATTDAWTRVFAFFDEHL    | 0.528 | 0.481 | -2 | 5 |
| A0QV73 | 135 | MSMEG_2471 | Pyruvate dehydrogenase E1 component                    | 504-521 | ETNLVGLLGELGATWSRW    | 0.579 | 0.527 | -1 | 6 |
| A0QVA0 | 136 | MSMEG_2500 | Uncharacterized protein                                | 377-395 | RLIAQRFAQIAQRFAHVLD   | 0.458 | 0.498 | 2  | 5 |
| A0QVG3 | 137 | MSMEG_2564 | Alcohol dehydrogenase, zinc-binding protein            | 89-106  | DHVVGWASGFDGLMEQVI    | 0.579 | 0.501 | -3 | 5 |
| A0QVG6 | 138 | MSMEG_2567 | Cyclohexanone monooxygenase                            | 426-443 | EVMAQFIADIDRWMQGTV    | 0.544 | 0.54  | -2 | 6 |
| A0QVT8 | 139 | MSMEG_2691 | Acetyltransferase, gnat family protein                 | 25-42   | LEKNLVTLYESVQEFWVA    | 0.587 | 0.499 | -2 | 6 |
| A0QVU2 | 140 | MSMEG_2695 | 35 kDa protein                                         | 5-23    | FVKAWKYLMAFSSKVDEY    | 0.578 | 0.539 | 1  | 6 |
| A0QVW5 | 141 | MSMEG_2719 | Hydrogen:quinone oxidoreductase                        | 217-234 | ATIQLMTDYMTRLMRYVE    | 0.526 | 0.493 | 0  | 8 |
| A0QW15 | 142 | MSMEG_2772 | Amino acid permease                                    | 475-494 | ALFVLMKLIHRHYDTVAREL  | 0.587 | 0.503 | 1  | 6 |
| A0QW38 | 143 | MSMEG_2795 | Transmembrane transport protein                        | 180-197 | QDVLGGWREALGSWTVLA    | 0.569 | 0.476 | -1 | 5 |
| A0QW49 | 144 | MSMEG_2805 | ISMsm5, transposase                                    | 304-323 | RGSFN SVKELIAAISAFIEG | 0.442 | 0.496 | 0  | 6 |
| A0QW69 | 145 | MSMEG_2837 | Nitrate reductase NarB                                 | 318-336 | GELIGTAERLLSTVLQGFY   | 0.571 | 0.487 | -1 | 6 |
| A0QW73 | 146 | MSMEG_2841 | Putative monooxygenase                                 | 172-189 | QWAE EYEVVYKLWEGSW    | 0.532 | 0.468 | -3 | 6 |
| A0QW87 | 147 | MSMEG_2855 | Virulence factor Mce family protein                    | 132-152 | DHVTVEINTIFEKLVLSKI   | 0.498 | 0.518 | -1 | 6 |
| A0QWF9 | 148 | MSMEG_2928 | Uncharacterized protein                                | 309-327 | FLNALVDFATEGFGALANM   | 0.622 | 0.513 | -2 | 7 |

|        |     |            |                                                                  |         |                         |       |       |    |   |
|--------|-----|------------|------------------------------------------------------------------|---------|-------------------------|-------|-------|----|---|
| A0QWP7 | 149 | MSMEG_3017 | Uncharacterized protein                                          | 861-878 | ELADLLDAIHIGLRDLAT      | 0.526 | 0.497 | -3 | 6 |
| A0QWP8 | 150 | MSMEG_3018 | Transglutaminase domain protein                                  | 153-170 | LIEVLRDLTSRIYTDFTY      | 0.565 | 0.505 | -1 | 7 |
| A0QWV7 | 151 | MSMEG_3079 | Nucleotide-binding protein<br>MSMEG_3079/MSMEI_3001              | 222-240 | GALEFLDITYHRLLDVVIDG    | 0.554 | 0.486 | -3 | 7 |
| A0QWZ8 | 152 | MSMEG_3121 | DNA-binding protein                                              | 219-238 | EAFAEILGTHVQRLATIVNG    | 0.485 | 0.466 | -1 | 5 |
| A0QX09 | 153 | MSMEG_3132 | DNA-binding protein                                              | 166-183 | NWEGLTAWAVRWLRDFTG      | 0.571 | 0.543 | 0  | 5 |
| A0QX63 | 154 | MSMEG_3187 | Putative acyltransferase domain<br>protein                       | 219-236 | DQATAYYNSFARAWELLL      | 0.516 | 0.481 | -1 | 6 |
| A0QXC2 | 155 | MSMEG_3249 | Branched chain amino acid transport<br>permease                  | 170-188 | TLGFGEIIRLMADNLSGIT     | 0.554 | 0.461 | -2 | 6 |
| A0QXC4 | 156 | MSMEG_3251 | Branched-chain amino acid ABC<br>transporter ATP-binding protein | 182-200 | VISQIFRIIADINSQGTTV     | 0.587 | 0.482 | 0  | 5 |
| A0QXD2 | 157 | MSMEG_3259 | Acyl-CoA dehydrogenase                                           | 87-104  | LAHILRVHFSVVEELQRA      | 0.537 | 0.508 | 0  | 5 |
| A0QXD5 | 158 | MSMEG_3263 | Xylulose kinase                                                  | 343-360 | LFRAAYEGISFGIRQILE      | 0.578 | 0.478 | 0  | 7 |
| A0QXE6 | 159 | MSMEG_3273 | Aminopeptidase                                                   | 38-56   | YVDGLWTDAAAGNLVGLLRG    | 0.536 | 0.443 | -1 | 5 |
| A0QXE7 | 160 | MSMEG_3274 | MerR-family protein transcriptional<br>regulator                 | 138-156 | SQIGAWFAASVDTLQRALS     | 0.506 | 0.455 | 0  | 5 |
| A0QXF8 | 161 | MSMEG_3285 | 3-isopropylmalate dehydrogenase                                  | 238-257 | NMFGDILSDLTGQLSGSLGM    | 0.532 | 0.466 | -2 | 6 |
| A0QXG5 | 162 | MSMEG_3292 | DNA-binding protein                                              | 195-212 | ELITELLHTSTRFRNLWS      | 0.532 | 0.495 | 0  | 6 |
| A0QXI4 | 163 | MSMEG_3313 | ROK-family transcriptional regulator                             | 306-323 | LAEVATSLGRGIGGLVNL      | 0.535 | 0.534 | 0  | 5 |
| A0QXL9 | 164 | MSMEG_3350 | TRAP dicarboxylate transporter,<br>DctM subunit                  | 285-302 | WIREIGESLREAIGLTAM      | 0.51  | 0.477 | -1 | 6 |
| A0QXM9 | 165 | MSMEG_3360 | Transcriptional regulator, TetR<br>family                        | 120-137 | LTAVISRGFRDVIIVLSA      | 0.598 | 498   | 1  | 5 |
| A0QXQ3 | 166 | MSMEG_3385 | Uncharacterized protein                                          | 78-95   | IWDRTLTKLVALDNTIID      | 0.564 | 0.51  | -1 | 7 |
| A0QXT9 | 167 | MSMEG_3423 | IclR family transcriptional regulator                            | 78-95   | LGS AFLSGFNQIREFYRV     | 0.528 | 0.469 | 1  | 6 |
| A0QXW8 | 168 | MSMEG_3452 | TetR family protein transcriptional<br>regulator                 | 121-138 | FADSLTMLTEAVGTLLEA      | 0.576 | 0.508 | -3 | 6 |
| A0QXZ0 | 169 | MSMEG_3474 | Probable conserved integral<br>membrane protein                  | 138-156 | WGALEQRWGRIVAALVSTV     | 0.612 | 0.575 | 1  | 5 |
| A0QXZ4 | 170 | MSMEG_3478 | Aminopyrimidine aminohydrolase                                   | 24-43   | LTF SARLWQQIETVYEEILA   | 0.633 | 0.464 | -2 | 8 |
| A0QXZ6 | 171 | MSMEG_3480 | Aminoglycoside/hydroxyurea<br>antibiotic resistance kinase       | 21-38   | WVDGLAKLVRTQIGDWEL      | 0.556 | 0.509 | -1 | 5 |
| A0QY08 | 172 | MSMEG_3492 | Phosphodiesterase                                                | 219-239 | TAWLMQLRQVDRLVESIVETL   | 0.572 | 0.513 | -1 | 5 |
| A0QY46 | 173 | MSMEG_3531 | Uncharacterized protein                                          | 154-171 | SRAIGSVRGLVGWLERLL      | 0.547 | 0.514 | 2  | 6 |
| A0QY67 | 174 | MSMEG_3552 | Uncharacterized protein                                          | 99-121  | EKLTAAIHRDFSVLWAAFRELAE | 0.441 | 0.512 | -1 | 7 |
| A0QY87 | 175 | MSMEG_3572 | Transcriptional regulator, TetR<br>family                        | 146-163 | TRFLVGGFVEVLRSWMED      | 0.571 | 0.501 | -1 | 5 |

|        |     |            |                                                |         |                            |       |       |    |   |
|--------|-----|------------|------------------------------------------------|---------|----------------------------|-------|-------|----|---|
| A0QY93 | 176 | MSMEG_3578 | Putative cyclase                               | 169-187 | SGWSAANALFNGFFREIVT        | 0.558 | 0.447 | 0  | 6 |
| A0QYA9 | 177 | MSMEG_3594 | Anthranilate dioxygenase reductase             | 182-199 | LLGALGAEVAEVFAQLHR         | 0.549 | 0.505 | -1 | 5 |
| A0QYF9 | 178 | MSMEG_3644 | Transcriptional regulator, MerR family protein | 82-100  | LVLKIVKRLLDTGISLHNI        | 0.649 | 0.429 | 2  | 6 |
| A0QYG0 | 179 | MSMEG_3645 | Uncharacterized protein                        | 56-73   | LTHDLIRDLIAALGHSLK         | 0.537 | 0.5   | 0  | 7 |
| A0QYH1 | 180 | MSMEG_3656 | ABC transporter, permease/ATP-binding protein  | 37-57   | TLIARFTTWGRQFWRVTGGYF      | 0.65  | 0.504 | 3  | 8 |
| A0QYL5 | 181 | MSMEG_3701 | Uncharacterized protein                        | 315-335 | FTTLFGGTDSLKRLWHNLATM      | 0.568 | 0.434 | 1  | 6 |
| A0QYM8 | 182 | MSMEG_3715 | Linear gramicidin synthetase subunit C         | 653-670 | FADVVDVLQDLLDHHAAL         | 0.563 | 0.54  | -4 | 5 |
| A0QYQ8 | 183 | MSMEG_3748 | Conserved membrane protein                     | 142-160 | GLVAHLEAFAGNTIEFIRS        | 0.536 | 0.448 | -1 | 6 |
| A0QYR7 | 184 | MSMEG_3761 | Clp, N terminal                                | 34-51   | LVGVLQSAGRDLGALLAG         | 0.546 | 0.467 | 0  | 5 |
| A0QYV0 | 185 | MSMEG_3795 | Uncharacterized protein                        | 61-78   | RRLITALAGLVTASAEYL         | 0.547 | 0.483 | 1  | 6 |
| A0QYV7 | 186 | MSMEG_3802 | Tetratricopeptide TPR_4                        | 323-341 | SWLSIFRGAFDEATQLVAE        | 0.531 | 0.491 | -2 | 6 |
| A0QYZ1 | 187 | MSMEG_3837 | Uncharacterized protein                        | 222-239 | DVISGTSRLIAGFVQIAQ         | 0.551 | 0.472 | 0  | 5 |
| A0QZ66 | 188 | MSMEG_3915 | NAD-dependent alcohol dehydrogenase            | 299-316 | SYFGSFWGNYNLDEVLA          | 0.569 | 0.51  | -2 | 7 |
| A0QZ82 | 189 | MSMEG_3931 | [NiFe] hydrogenase, beta subunit, putative     | 5-22    | AGIHRLVATLIDRGYRVI         | 0.523 | 0.529 | 2  | 6 |
| A0QZF6 | 190 | MSMEG_4008 | 2OG-Fe(II) oxygenase                           | 146-163 | AAWTTYFHAMNDLARKLM         | 0.521 | 0.512 | 1  | 7 |
| A0QZF6 | 190 | MSMEG_4008 | 2OG-Fe(II) oxygenase                           | 245-262 | DALVVNIGDLMAQWTNDL         | 0.554 | 0.526 | -3 | 6 |
| A0QZF8 | 191 | MSMEG_4010 | Glyoxalase family protein                      | 9-28    | SVFASDIEKLSTFYADLLGL       | 0.597 | 0.425 | -2 | 6 |
| A0QZG1 | 192 | MSMEG_4013 | Methylenetetrahydromethanopterin reductase     | 156-173 | KVLDLIGRHADGFILQLA         | 0.578 | 0.47  | 0  | 5 |
| A0QZH2 | 193 | MSMEG_4024 | Transcriptional regulator, TetR family protein | 135-153 | FAEGYWRWITLLEDGFHRM        | 0.637 | 0.567 | -1 | 7 |
| A0QZH2 | 193 | MSMEG_4024 | Transcriptional regulator, TetR family protein | 365-384 | YDRWLALFYDGMTAMVRQHD       | 0.475 | 0.494 | -1 | 7 |
| A0QZH2 | 193 | MSMEG_4024 | Transcriptional regulator, TetR family protein | 192-209 | LVDATQFLVNYIRMFADK         | 0.552 | 0.474 | 0  | 5 |
| A0QZI4 | 194 | MSMEG_4036 | Crotonobetaine/carnitine-CoA ligase            | 226-246 | SSFWSVDVAKYGATVFNAIGAM     | 0.537 | 0.459 | 0  | 6 |
| A0QZL8 | 195 | MSMEG_4072 | ISMsm5, transposase                            | 299-324 | RGSFNSVKELIAAISAFIEGWNQRAH | 0.373 | 0.469 | 1  | 7 |
| A0QZR4 | 196 | MSMEG_4120 | CAIB/BAIF family protein                       | 86-103  | DVLLRLIDSADAFLQSMN         | 0.513 | 0.503 | -2 | 6 |
| A0QZU0 | 197 | MSMEG_4148 | Lipase                                         | 81-99   | WAHGGQWVRTTVDLLDTFF        | 0.651 | 0.49  | -1 | 6 |
| A0QZU7 | 198 | MSMEG_4155 | Transposase A                                  | 21-39   | NTIKAYAHDLKDWFTFLGG        | 0.481 | 0.517 | 0  | 6 |
| A0QZV4 | 199 | MSMEG_4162 | Uncharacterized protein                        | 210-227 | MATVIDIIGTHVDRVRGI         | 0.527 | 0.473 | 0  | 5 |

|        |     |            |                                                                                                  |         |                        |       |       |    |   |
|--------|-----|------------|--------------------------------------------------------------------------------------------------|---------|------------------------|-------|-------|----|---|
| A0R000 | 200 | MSMEG_4211 | Two component system histidine kinase                                                            | 444-461 | LATDVITLLGNLVDNAVE     | 0.557 | 0.471 | -3 | 5 |
| A0R091 | 201 | MSMEG_4302 | Adenylate cyclase, putative                                                                      | 221-238 | TDALHRAIAEHLDELLVW     | 0.538 | 0.476 | -3 | 6 |
| A0R0G4 | 202 | MSMEG_4377 | Amino acid permease family protein, putative                                                     | 81-101  | GSIQWTKRLAGNVAGWFAGW   | 0.598 | 0.551 | 2  | 7 |
| A0R0H1 | 203 | MSMEG_4384 | Penicillin binding protein transpeptidase domain protein                                         | 95-112  | LQGTNLGLIGYLRGIDDV     | 0.526 | 0.545 | -1 | 6 |
| A0R0H5 | 204 | MSMEG_4388 | ABC transporter                                                                                  | 461-478 | TIQAQVLDLLTDLQEQLG     | 0.516 | 0.48  | -3 | 5 |
| A0R0K9 | 205 | MSMEG_4422 | Oxidoreductase                                                                                   | 196-214 | EFSTILAGLGSEVTHLVRG    | 0.512 | 0.471 | -1 | 5 |
| A0R0L7 | 206 | MSMEG_4430 | ATP-dependent transcriptional regulator, MalT-like, LuxR family                                  | 328-349 | LDMSRHWYRYHHLFGELLRAEL | 0.512 | 0.416 | 0  | 8 |
| A0R0N1 | 207 | MSMEG_4443 | Uncharacterized protein                                                                          | 44-62   | SQLYGLLDRVRDLGLELVS    | 0.479 | 0.446 | -1 | 5 |
| A0R0Q5 | 208 | MSMEG_4470 | ABC transporter                                                                                  | 140-158 | MFDTLTANIDGLAAVFARV    | 0.582 | 0.546 | -1 | 6 |
| A0R0S3 | 209 | MSMEG_4489 | Uncharacterized protein                                                                          | 6-24    | DLLQRLSTVLAEVMSVAEE    | 0.451 | 0.501 | -3 | 5 |
| A0R0S6 | 210 | MSMEG_4492 | Amidase                                                                                          | 282-300 | EILAAALQTIADHLGELGHT   | 0.518 | 0.463 | -3 | 6 |
| A0R0U5 | 211 | MSMEG_4511 | Linear gramicidin synthetase subunit B                                                           | 746-763 | IADKFHATFDSLLHNFYG     | 0.528 | 0.529 | -1 | 6 |
| A0R0Y4 | 212 | MSMEG_4551 | Monooxygenase                                                                                    | 161-178 | MAQEFVEVTKLWEGSWE      | 0.521 | 0.477 | -3 | 6 |
| A0R0Z4 | 213 | MSMEG_4561 | ABC Fe <sup>3+</sup> -siderophores transporter, periplasmic binding protein                      | 168-185 | LTFDTLFDEINQLARMFD     | 0.531 | 0.518 | -3 | 6 |
| A0R113 | 214 | MSMEG_4582 | VWA containing CoxE-like protein                                                                 | 140-157 | LATLIAQIVEAYGRYTSS     | 0.536 | 0.487 | 0  | 6 |
| A0R117 | 215 | MSMEG_4586 | ABC nitrate/sulfonate/bicarbonate family protein transporter, periplasmic ligand binding protein | 250-267 | LQDFFGRLSGFWDWYKAN     | 0.563 | 0.495 | 0  | 7 |
| A0R133 | 216 | MSMEG_4601 | Transcriptional regulator AraC family                                                            | 174-191 | WWANALHVSERTVARLFR     | 0.508 | 0.501 | 2  | 5 |
| A0R190 | 217 | MSMEG_4665 | IolE protein                                                                                     | 26-43   | YTRFLDEVASAGYRWIEL     | 0.508 | 0.528 | -1 | 6 |
| A0R1A9 | 218 | MSMEG_4685 | Oxidoreductase                                                                                   | 142-160 | AMRKLSDLLALFAHALGL     | 0.579 | 0.449 | 0  | 8 |
| A0R1C6 | 219 | MSMEG_4703 | Glycerol-3-phosphate acyltransferase                                                             | 212-229 | EMLDELSTGWSRFSVDLI     | 0.539 | 0.545 | -3 | 7 |
| A0R1E0 | 220 | MSMEG_4718 | Transcriptional regulator, TetR family protein                                                   | 61-78   | LVELLVGISTRLLDGARE     | 0.511 | 0.492 | -1 | 6 |
| A0R1J5 | 221 | MSMEG_4776 | Glyoxalase/bleomycin resistance protein/dioxygenase                                              | 15-32   | VVADLDDAISRWLQMGVVG    | 0.521 | 0.49  | -2 | 5 |
| A0R1J8 | 222 | MSMEG_4779 | Probable regulatory protein                                                                      | 50-67   | VHYYFRTMDDLFLAVFRR     | 0.583 | 0.468 | 1  | 6 |
| A0R1K6 | 223 | MSMEG_4787 | Virulence factor Mce family protein                                                              | 194-212 | SGNIVDIKLNLTFTVTLR     | 0.507 | 0.489 | 1  | 6 |
| A0R1L1 | 224 | MSMEG_4793 | Virulence factor Mce family protein                                                              | 161-180 | SSLIQIFQGGDTLSSLMSK    | 0.468 | 0.443 | 0  | 5 |
| A0R1M3 | 225 | MSMEG_4805 | Acyl-CoA dehydrogenase                                                                           | 352-370 | HYFASWFERYARSFGGTIA    | 0.522 | 0.5   | 1  | 7 |

|        |     |            |                                                          |         |                        |       |       |    |   |
|--------|-----|------------|----------------------------------------------------------|---------|------------------------|-------|-------|----|---|
| A0R1M3 | 225 | MSMEG_4805 | Acyl-CoA dehydrogenase                                   | 251-268 | MMWLGAFADRIDNMLADFN    | 0.601 | 0.49  | -2 | 7 |
| A0R1N3 | 226 | MSMEG_4815 | Thioesterase                                             | 226-243 | ENVWEAGTDALAAIGAMF     | 0.508 | 0.468 | -3 | 5 |
| A0R1S0 | 227 | MSMEG_4852 | Enoyl-CoA hydratase, putative                            | 258-277 | EYMGSLLSAFFESMGNGVAN   | 0.482 | 0.431 | -2 | 7 |
| A0R1S4 | 228 | MSMEG_4856 | Cytochrome P450                                          | 279-298 | KVIANAVEELMRYLSIIQTG   | 0.508 | 0.476 | 0  | 5 |
| A0R1T9 | 229 | MSMEG_4871 | 3-hydroxyacyl-CoA dehydrogenase type-2                   | 103-120 | LDGFKKTIEFYLTAVFNV     | 0.601 | 0.471 | 0  | 6 |
| A0R1U8 | 230 | MSMEG_4880 | Methylmalonyl-CoA mutase C-terminal domain protein       | 31-48   | FEVIYTGIRQRIEDIVSI     | 0.562 | 0.495 | -1 | 6 |
| A0R1U9 | 231 | MSMEG_4881 | Methylmalonyl-CoA mutase, N-terminus of large subunit    | 323-340 | LASVLGGVQSMFTAAWDE     | 0.588 | 0.476 | -2 | 5 |
| A0R1W1 | 232 | MSMEG_4893 | Putative neutral zinc metalloproteinase                  | 300-317 | ITEDLLTDVMDSLGQIFA     | 0.587 | 0.5   | -4 | 7 |
| A0R1Z7 | 233 | MSMEG_4934 | ATP:cob(I)alamin adenosyltransferase                     | 160-177 | KYLNRLSDLLFILSRVAN     | 0.529 | 0.49  | 2  | 6 |
| A0R231 | 234 | MSMEG_4968 | Two-component system sensor kinase                       | 89-106  | TRFWKGVAAHHLRMIYDL     | 0.592 | 0.544 | 2  | 7 |
| A0R262 | 235 | MSMEG_4998 | Hydrolase, alpha/beta fold family protein                | 213-237 | LDRQLDLLLDGHTLLWRTLGRV | 0.514 | 0.501 | 1  | 8 |
| A0R2B5 | 236 | MSMEG_5053 | Short chain alcohol dehydrogenase                        | 247-264 | KILDVIVRITGSGYQRLF     | 0.567 | 0.494 | 2  | 7 |
| A0R2D8 | 237 | MSMEG_5076 | ABC transporter membrane-spanning protein                | 202-220 | LIRGVGDVIDNSGSILSWF    | 0.632 | 0.532 | -2 | 6 |
| A0R2E9 | 238 | MSMEG_5087 | Cytokinin riboside 5'-monophosphate phosphoribohydrolase | 125-142 | TLEEFFEAWTAGYLGMDH     | 0.556 | 0.484 | -4 | 6 |
| A0R2H7 | 239 | MSMEG_5117 | L-proline dehydrogenase                                  | 155-173 | SIVRDLRTEFDWLGTVLQA    | 0.513 | 0.464 | -1 | 5 |
| A0R2H9 | 240 | MSMEG_5120 | Transcriptional regulator, CdaR                          | 464-481 | VLAETLRVYLDSEFGDVAA    | 0.526 | 0.482 | -2 | 5 |
| A0R2J8 | 241 | MSMEG_5140 | Nitrate reductase, alpha subunit                         | 202-219 | AGSRFVELIGGVMTSFYD     | 0.543 | 0.502 | -1 | 6 |
| A0R2Q5 | 242 | MSMEG_5197 | Acyl-CoA dehydrogenase                                   | 357-376 | GRIQTIFGGTTEIMKEIIGR   | 0.415 | 0.494 | 1  | 7 |
| A0R2U4 | 243 | MSMEG_5237 | Conserved membrane protein                               | 50-68   | QRLLRRFNSGIAVTLTVLA    | 0.531 | 0.468 | 3  | 6 |
| A0R2U9 | 244 | MSMEG_5241 | GAF family protein                                       | 423-440 | VDDLQAVISEIRTAIFDL     | 0.538 | 0.521 | -3 | 5 |
| A0R2Z6 | 245 | MSMEG_5288 | Putative serine/threonine protein kinase                 | 374-391 | DAIGFWQRLHHTFAAVLR     | 0.594 | 0.535 | 1  | 6 |
| A0R342 | 246 | MSMEG_5335 | Formamidase                                              | 276-293 | MGGFIDMHVDLIKGGMET     | 0.512 | 0.472 | -2 | 7 |
| A0R347 | 247 | MSMEG_5341 | Alpha/beta superfamily hydrolase                         | 378-397 | LGAVHRAHQVFDWLDEIVG    | 0.58  | 0.492 | -2 | 5 |
| A0R352 | 248 | MSMEG_5346 | TetR-family protein transcriptional regulator            | 182-201 | QTLDEINELATNVVDLLITG   | 0.485 | 0.444 | -4 | 5 |
| A0R377 | 249 | MSMEG_5372 | Sensor protein KdpD                                      | 287-304 | RVLRLDAAASLGATLHTVI    | 0.544 | 0.509 | 1  | 5 |
| A0R377 | 249 | MSMEG_5372 | Sensor protein KdpD                                      | 111-128 | WQDVEELLNAGITVISTV     | 0.602 | 0.482 | -3 | 5 |

|        |     |            |                                                               |         |                            |       |       |    |   |
|--------|-----|------------|---------------------------------------------------------------|---------|----------------------------|-------|-------|----|---|
| A0R379 | 250 | MSMEG_5374 | Glutamate--ammonia ligase                                     | 202-220 | GDEIDHILSILRDHIVALG        | 0.531 | 0.483 | -3 | 6 |
| A0R398 | 251 | MSMEG_5395 | Sensor protein KdpD                                           | 653-674 | AELLATIEESVDALTALVGNLL     | 0.585 | 0.518 | -4 | 7 |
| A0R398 | 251 | MSMEG_5395 | Sensor protein KdpD                                           | 114-131 | WQDVDELLNAGITVISTV         | 0.594 | 0.482 | -3 | 5 |
| A0R3F9 | 252 | MSMEG_5458 | Acetyltransferase Pat                                         | 124-141 | MFDRLVRIARQRLAAFIT         | 0.511 | 0.47  | 3  | 5 |
| A0R3K1 | 253 | MSMEG_5501 | Uncharacterized protein                                       | 485-503 | NDITYAIAAALTQIVEGIR        | 0.505 | 0.476 | -1 | 5 |
| A0R3M9 | 254 | MSMEG_5530 | Putative aliphatic sulfonates transport permease protein SsuC | 268-285 | SYSLVRLLELLLLSWRNG         | 0.569 | 0.479 | 2  | 6 |
| A0R3M9 | 254 | MSMEG_5530 | Putative aliphatic sulfonates transport permease protein SsuC | 111-134 | VVLAVLAGLTRTGEDLLDWTMQL    | 0.714 | 0.447 | -2 | 9 |
| A0R3R4 | 255 | MSMEG_5567 | Transcriptional regulator, TetR family                        | 81-98   | GSYQEDLLHFLNQTFKLL         | 0.553 | 0.499 | -1 | 5 |
| A0R3S6 | 256 | MSMEG_5579 | MarR-family protein transcriptional regulator                 | 13-33   | NRTWAHFLESTTLILDELNRQ      | 0.397 | 0.473 | -1 | 6 |
| A0R3U2 | 257 | MSMEG_5595 | MarR family transcriptional regulator                         | 12-29   | YEMWRGYLDSTRLLLLRAL        | 0.555 | 0.539 | 1  | 9 |
| A0R3X9 | 258 | MSMEG_5633 | AMP-dependent synthetase and ligase                           | 269-287 | VDSLKKAALAYGQIFVQLY        | 0.566 | 0.509 | 1  | 7 |
| A0R403 | 259 | MSMEG_5658 | Epoxide hydrolase                                             | 145-162 | GIGRIAQAWDTLMTRLGY         | 0.532 | 0.505 | 1  | 6 |
| A0R404 | 260 | MSMEG_5659 | ABC transporter, ATP-binding protein                          | 157-175 | VEAIQDMLETGFDSLITAV        | 0.554 | 0.505 | -4 | 5 |
| A0R441 | 261 | MSMEG_5696 | 'Cold-shock' DNA-binding domain protein                       | 102-119 | ELHGMVEDMITLLESADVQ        | 0.531 | 0.489 | -4 | 6 |
| A0R4F5 | 262 | MSMEG_5815 | Betaine aldehyde dehydrogenase                                | 75-93   | MLVGLADVVEHLDELAGL         | 0.603 | 0.5   | -4 | 6 |
| A0R4I7 | 263 | MSMEG_5849 | RelA/SpoT domain protein                                      | 154-171 | SFEQLRSELLRLMELIAG         | 0.522 | 0.492 | -1 | 6 |
| A0R4I9 | 264 | MSMEG_5850 | Transcriptional regulator, TetR family protein                | 49-68   | TYYFSSLDLIAKAVEYIGM        | 0.588 | 0.398 | -2 | 7 |
| A0R4J3 | 265 | MSMEG_5854 | Transcriptional regulator, TetR family protein                | 68-85   | VHAASGFLDRLAAHLSGI         | 0.531 | 0.467 | 0  | 5 |
| A0R4M2 | 266 | MSMEG_5884 | 3-hydroxyisobutyrate dehydrogenase family protein             | 181-198 | IASVIESLGEAMALVGKA         | 0.531 | 0.473 | -1 | 5 |
| A0R4N0 | 267 | MSMEG_5891 | ISMsm5, transposase                                           | 304-329 | RGSFNVSVELIAAISAFIEGWNQRAH | 0.373 | 0.469 | 1  | 7 |
| A0R4N2 | 268 | MSMEG_5894 | Uncharacterized protein                                       | 151-168 | LEKIDEIAKNASVLISVW         | 0.522 | 0.491 | -1 | 6 |
| A0R4N5 | 269 | MSMEG_5897 | MCE-family protein MCE4d                                      | 279-296 | FTQILTDHSEDIEQLLHV         | 0.511 | 0.5   | -4 | 6 |
| A0R4P0 | 270 | MSMEG_5902 | Conserved hypothetical integral membrane protein Yrbe4a       | 10-28   | RAVGGFVEMSLDTFAKIFR        | 0.472 | 0.547 | 1  | 5 |
| A0R4P7 | 271 | MSMEG_5909 | NAD-dependent epimerase/dehydratase                           | 239-256 | VLVSFNEWIDILEQGVGR         | 0.599 | 0.513 | -2 | 6 |
| A0R4V2 | 272 | MSMEG_5964 | Glycosyl transferase, group 1, putative                       | 388-405 | AAAIDSYEDWIVGLAESI         | 0.548 | 0.494 | -4 | 6 |
| A0R4V7 | 273 | MSMEG_5969 | Uncharacterized protein                                       | 158-178 | GNLLNILKNFDHIFVSVRDAV      | 0.524 | 0.507 | 0  | 6 |
| A0R4Y6 | 274 | MSMEG_5998 | Uncharacterized protein                                       | 18-35   | AKSTGTLIKWMSRFQTFLL        | 0.559 | 0.494 | 3  | 6 |



|        |     |            |                                                  |           |                             |       |       |    |   |
|--------|-----|------------|--------------------------------------------------|-----------|-----------------------------|-------|-------|----|---|
| A0R511 | 275 | MSMEG_6024 | Acetoacetyl-CoA synthase                         | 115-132   | WKELLGRTAAFADALVSL          | 0.562 | 0.508 | 0  | 6 |
| A0R5A5 | 276 | MSMEG_6122 | ABC transporter, membrane spanning protein       | 125-143   | SVIGMWAGYHRGWRETAM          | 0.551 | 0.456 | 1  | 6 |
| A0R5G0 | 277 | MSMEG_6178 | D-galactonate transporter                        | 372-389   | KRLGLTGGMFNFIGNLS           | 0.579 | 0.521 | 2  | 8 |
| A0R5H9 | 278 | MSMEG_6197 | Diaminopimelate decarboxylase                    | 282-299   | LFDGTYTVVTEFGRALTA          | 0.534 | 0.472 | -1 | 5 |
| A0R5J7 | 279 | MSMEG_6216 | Integral membrane protein                        | 144-162   | VTIGQAWERLRGRLALIG          | 0.572 | 0.445 | 2  | 6 |
| A0R5R4 | 280 | MSMEG_6283 | FAD binding domain protein                       | 185-202   | FHSITDLVAAMDRIIETG          | 0.521 | 0.498 | -2 | 6 |
| A0R5Y9 | 281 | MSMEG_6363 | Cysteine desulfurase family protein              | 297-314   | GVYLSRLFDYLQTSLSL           | 0.587 | 0.517 | 1  | 8 |
| A0R5Z4 | 282 | MSMEG_6368 | DNA-binding protein                              | 79-96     | WSVIVRGTAELLQTAEDI          | 0.528 | 0.5   | -2 | 5 |
| A0R684 | 283 | MSMEG_6459 | Ferredoxin-dependent glutamate synthase 1        | 1181-1199 | VENFFMFIAEEVRELMAQL         | 0.616 | 0.534 | -3 | 6 |
| A0R690 | 284 | MSMEG_6465 | Chloride channel                                 | 154-172   | HISAGFGSLLTRWLNLSDE         | 0.537 | 0.501 | -1 | 7 |
| A0R6B7 | 285 | MSMEG_6492 | GAF domain protein, putative                     | 20-37     | LSHVLAIEAETARSLGFG          | 0.587 | 0.495 | -1 | 6 |
| A0R6D3 | 286 | MSMEG_6508 | MarR family transcriptional regulator            | 133-150   | IEHLAKGLDVLAELTRLL          | 0.566 | 0.52  | -1 | 7 |
| A0R6F7 | 287 | MSMEG_6532 | Transcriptional regulator, TetR family           | 95-113    | EFDQTLRSILAVVVDLHHD         | 0.472 | 0.476 | -3 | 5 |
| A0R6H0 | 288 | MSMEG_6546 | Transcriptional regulatory protein               | 133-150   | ISDGGFFQTLANLVAEALD         | 0.547 | 0.474 | -3 | 6 |
| A0R6H8 | 289 | MSMEG_6554 | Hypothetical ABC transporter ATP-binding protein | 492-509   | ASSFRRRLDEYIGFLVAW          | 0.517 | 0.496 | 1  | 6 |
| A0R6L1 | 290 | MSMEG_6588 | Fumarylacetoacetate                              | 283-300   | GDTLTLILDDIGRIEHTI          | 0.514 | 0.497 | -3 | 5 |
| A0R6L6 | 291 | MSMEG_6591 | Aminotransferase class V                         | 287-304   | VDALQDMLESLGATIVSA          | 0.516 | 0.494 | -3 | 5 |
| A0R6M6 | 292 | MSMEG_6603 | NADH:flavin oxidoreductase/nadh oxidase          | 38-56     | KAITAAILRGVLRVFTDFR         | 0.509 | 0.448 | 3  | 5 |
| A0R6P2 | 293 | MSMEG_6621 | Bacterial luciferase family protein              | 265-282   | HTATLEFIDHYAEMLGKL          | 0.513 | 0.478 | -2 | 7 |
| A0R6R3 | 294 | MSMEG_6642 | Caib/baif family protein                         | 106-123   | WNMSYETLRRINDQIVML          | 0.514 | 0.472 | 0  | 5 |
| A0R6S7 | 295 | MSMEG_6657 | Alpha subunit of malonate decarboxylase          | 121-138   | GAIHTYVELYARMFTDLA          | 0.584 | 0.49  | -1 | 7 |
| A0R6V9 | 296 | MSMEG_6688 | Purine catabolism PurC domain protein            | 425-442   | LLAGGDELIDALTAFLRH          | 0.568 | 0.534 | -2 | 7 |
| A0R6Z2 | 297 | MSMEG_6722 | Uncharacterized protein                          | 158-176   | TWAQFTQYWEQQLDELSVA         | 0.528 | 0.468 | -3 | 5 |
| A0R730 | 298 | MSMEG_6761 | Glycerol-3-phosphate dehydrogenase               | 435-452   | VAHLLGRYGTLDLELLEI          | 0.577 | 0.486 | -2 | 7 |
| A0R732 | 299 | MSMEG_6762 | Transcriptional regulator                        | 79-96     | VATVRSVSQMLAELEQIW          | 0.578 | 0.471 | -1 | 5 |
| A0R738 | 300 | MSMEG_6768 | Halogenase                                       | 453-471   | GLIALSNRMQSFFREWAAV         | 0.571 | 0.487 | 1  | 6 |
| A0R738 | 300 | MSMEG_6768 | Halogenase                                       | 383-408   | AQISDTLYRSLTDMWLRVYQDQ YTLM | 0.517 | 0.384 | -1 | 9 |

|        |     |            |                                                      |           |                          |       |       |    |   |
|--------|-----|------------|------------------------------------------------------|-----------|--------------------------|-------|-------|----|---|
| A0R743 | 301 | MSMEG_6773 | CaiB/BaiF family protein                             | 133-150   | GVDGIMQAVTGLMSTLGE       | 0.514 | 0.5   | -2 | 5 |
| A0R749 | 302 | MSMEG_6779 | Uncharacterized protein                              | 53-70     | VSDFLDGFVRGFLVSGIRH      | 0.528 | 0.528 | 0  | 6 |
| A0R751 | 303 | MSMEG_6781 | Uncharacterized protein                              | 154-171   | VNDLIFGTFREIERLMGL       | 0.573 | 0.497 | -1 | 6 |
| A0R776 | 304 | MSMEG_6807 | Transcriptional regulator, TetR family               | 60-77     | LFLAVSDRYWRRYFDNFA       | 0.532 | 0.471 | 1  | 7 |
| A0R7C4 | 305 | MSMEG_6858 | Epoxide hydrolase                                    | 150-167   | ITRIARAWDTLMVSLGYQ       | 0.597 | 0.47  | 1  | 6 |
| A0R7C5 | 306 | MSMEG_6859 | Oxidoreductase                                       | 106-123   | LADWHRTIDVNIGGVLNV       | 0.548 | 0.491 | -1 | 5 |
| A0R7E9 | 307 | MSMEG_6886 | Transcriptional regulator                            | 11-28     | SYTEEVFGLLGKRWGLI        | 0.573 | 0.479 | 0  | 5 |
| A0R714 | 308 | MSMEG_6928 | Uncharacterized protein                              | 554-571   | DDIIGGIAGVTGRLWGLT       | 0.586 | 0.492 | -1 | 6 |
| A0R715 | 309 | MSMEG_6929 | Integral membrane protein MviN                       | 1026-1043 | VMATILSRIFGDVGGGIN       | 0.595 | 0.473 | 0  | 6 |
| A0R143 | 310 | nadE       | Glutamine-dependent NAD(+) synthetase                | 612-634   | SYSLKEIRHWLQVFAQRFYSFSQ  | 0.519 | 0.418 | 2  | 7 |
| A0QU33 | 311 | nuoD       | NADH-quinone oxidoreductase subunit D                | 346-363   | IAKIMGRSMEGLIHFKL        | 0.553 | 0.488 | 2  | 6 |
| A0R260 | 312 | oppD       | ABC transporter, ATP-binding protein OppD            | 537-554   | SIQAGIINLLLDLQDRFG       | 0.593 | 0.481 | -1 | 6 |
| A0R712 | 313 | pcnB       | Poly(A) polymerase PcnA                              | 72-90     | QKFLRGWSDALWDTGIEFG      | 0.495 | 0.452 | -1 | 5 |
| A0QQ68 | 314 | phnE       | Phosphate-import permease protein PhnE               | 50-67     | TALIDGSDNIVALLQRFMI      | 0.579 | 0.513 | -1 | 7 |
| A0QNL6 | 315 | ptsI       | Phosphoenolpyruvate-protein phosphotransferase       | 95-114    | SEAVDQFIDMFTKMGLMAE      | 0.44  | 0.506 | -3 | 7 |
| A0QS46 | 316 | rplA       | 50S ribosomal protein L1                             | 94-117    | IVGSDDLIEKIQQGFLDFDAAIAT | 0.484 | 0.381 | -4 | 7 |
| A0QSD8 | 317 | rplP       | 50S ribosomal protein L16                            | 52-69     | IAINRHIKRGKWWINIF        | 0.528 | 0.53  | 4  | 5 |
| A0QS66 | 318 | rpoC       | DNA-directed RNA polymerase subunit beta'            | 835-852   | IKSSFREGLTVLEYFINT       | 0.518 | 0.482 | 0  | 6 |
| A0QW02 | 319 | rpoD       | RNA polymerase sigma factor SigA                     | 390-407   | SFTLLQDQLQSVLETSE        | 0.511 | 0.499 | -3 | 5 |
| A0R5B0 | 320 | rsfB       | Anti-sigma factor antagonist                         | 99-116    | GIADVVDLFDLDEALSS        | 0.516 | 0.472 | -4 | 5 |
| A0QY50 | 321 | speB       | Agmatinase                                           | 223-240   | MTWHTMQEIWDRGFKAVM       | 0.574 | 0.481 | 0  | 5 |
| A0R118 | 322 | ssuB       | Aliphatic sulfonates import ATP-binding protein SsuB | 53-70     | LLRILAGLEDATSGHLRI       | 0.536 | 0.472 | 0  | 6 |
| A0QW75 | 323 | ssuD       | Nitrilotriacetate monooxygenase                      | 370-388   | QIVGTAETAADIITQWIDE      | 0.48  | 0.473 | -4 | 5 |
| A0QQ53 | 324 | stf0       | Trehalose 2-sulfotransferase                         | 184-201   | VITMLRAQEEGWRAWFTE       | 0.512 | 0.468 | -1 | 5 |
| A0R3M4 | 325 | sucC       | Succinate--CoA ligase [ADP-forming] subunit beta     | 166-183   | LDAAAVTIQKLWEVFKVE       | 0.547 | 0.497 | -1 | 5 |
| A0R2C2 | 326 | sugA       | ABC sugar transporter, permease component            | 260-277   | DNLFKAFNVGLGSAISVL       | 0.583 | 0.471 | 0  | 6 |
| A0QWG2 | 327 | thrS       | Threonine--tRNA ligase                               | 544-566   | HRALFGSIERFFGVLTEHYAGAF  | 0.55  | 0.492 | 0  | 8 |

|        |     |      |                                  |         |                       |       |       |    |   |
|--------|-----|------|----------------------------------|---------|-----------------------|-------|-------|----|---|
| A0QYW4 | 328 | uvrA | UvrABC system protein A          | 872-889 | GLHFEDIRKLLKVINGLV    | 0.542 | 0.537 | 1  | 6 |
| A0QYW4 | 328 | uvrA | UvrABC system protein A          | 813-833 | ISSIHRYLKTLVDVGLGYVRL | 0.596 | 0.479 | 2  | 6 |
| A0QUX9 | 329 | wrbA | Flavodoxin/nitric oxide synthase | 93-110  | AAQFRAFIDSLGGLWAQG    | 0.556 | 0.49  | 0  | 6 |
| A0QYC6 | 330 | xfp  | Probable phosphoketolase         | 486-503 | YEAHVHIVDSMLNQHVKW    | 0.594 | 0.509 | -1 | 6 |
